# Supplementary material for: Development and application of a high throughput carbohydrate profiling technique for analyzing plant cell wall polysaccharides and carbohydrate active enzymes
Source: PubMed Central journal article supplement (PMC3717103; doi:10.1186/1754-6834-6-94), 2013-07-03

Fig S1

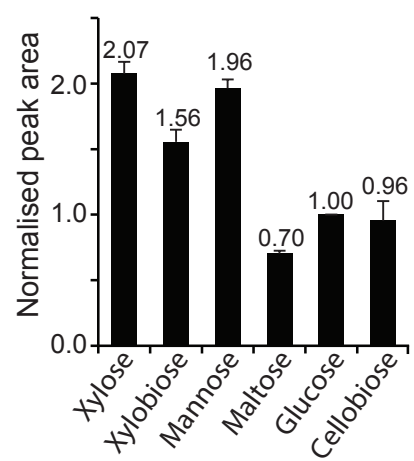

Supplement: 1754-6834-6-94-S1.pdf [file 1754-6834-6-94-S1.pdf]
